# Supplementary material
Source: PubMed Central journal article supplement (PMC1636612)
Supplement: 7601408s1.pdf [file 7601408s1.pdf]

**A**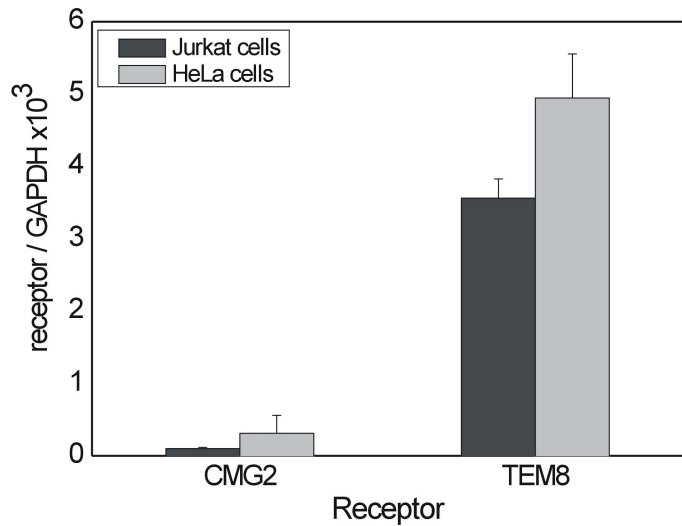**B**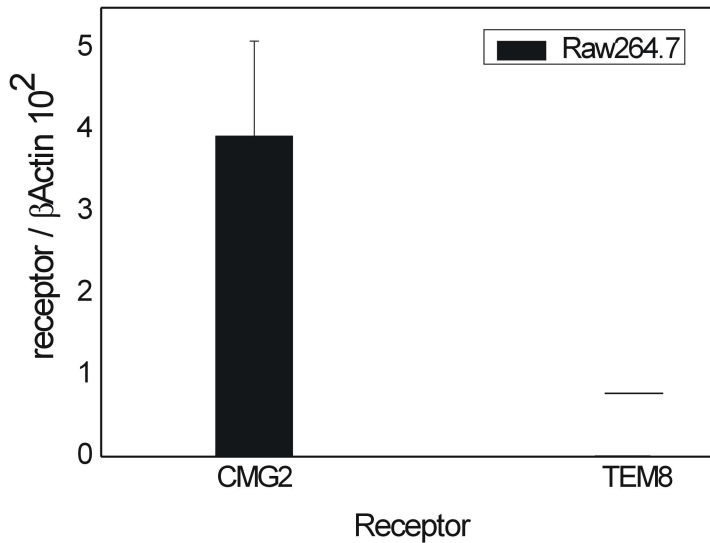

**Fig. S1. RT-PCR analysis of the two anthrax toxin receptors (TEM8 and CMG2) in the indicated cell lines.** The level of mRNA for the two receptors is expressed using as a reference an house keeping gene in Jurkat T cells and HeLa cells (panel A) and macrophage RAW264.7 cells (panel B). There is a large variation of expression of the two receptors in the cell lines tested here. The level of expression of the corresponding proteins could not be assessed because of the non availability to us of specific antibodies.
