# Supplementary material
Source: PubMed Central journal article supplement (PMC1636612)
Supplement: 7601408s2.pdf [file 7601408s2.pdf]

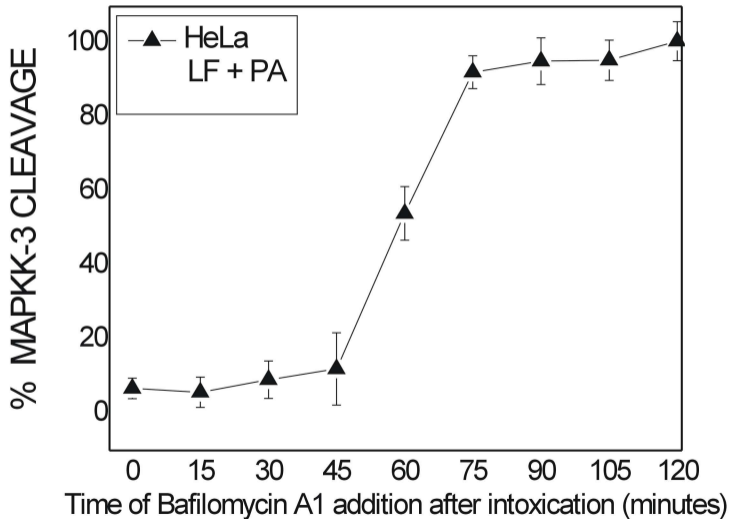

***Fig. S2. Time course of the anthrax lethal factor (LF) cleavage of MAPKK3 in HeLa cells.*** LF (10 nM final concentration) and PA (20 nM) were added to the cells, and, at the indicated time of incubation, cells were lysed and subjected to SDS-PAGE. Western blotting was performed with a polyclonal antibody specific for the isoform 3 of the MAPKK and stained. The ratio between the cleaved band with respect to the total is reported as a function of time.
